# Supplementary material for: In silico pharmacology suggests ginger extracts may reduce stroke risks
Source: Royal Society of Chemistry journal article supplement (doi:10.1039/c1mb05228d), 2011-07-21
Supplement: c1mb05228d.pdf [file c1mb05228d.pdf]

Table S1. Predicted pIC<sub>50</sub> of MLR and SVM models

| Compound | pIC <sub>50</sub> | SVM                         |          | MLR                         |          |
|----------|-------------------|-----------------------------|----------|-----------------------------|----------|
|          |                   | Predicted pIC <sub>50</sub> | Residual | Predicted pIC <sub>50</sub> | Residual |
| 1        | 4.09              | 4.66                        | 0.57     | 5.58                        | 1.49     |
| 2        | 4.72              | 4.56                        | -0.17    | 4.59                        | -0.13    |
| 3        | 6.57              | 4.99                        | -1.57    | 6.03                        | -0.54    |
| 4        | 4.72              | 5.18                        | 0.45     | 4.97                        | 0.25     |
| 5        | 4.30              | 5.42                        | 1.12     | 4.71                        | 0.41     |
| 6        | 4.01              | 3.63                        | -0.38    | 4.30                        | 0.29     |
| 7        | 5.34              | 4.71                        | -0.63    | 4.19                        | -1.15    |
| 8        | 4.85              | 5.90                        | 1.05     | 5.16                        | 0.31     |
| 9        | 5.70              | 5.37                        | -0.33    | 5.84                        | 0.14     |
| 10       | 6.00              | 6.55                        | 0.55     | 6.30                        | 0.30     |
| 11       | 6.80              | 5.11                        | -1.68    | 5.48                        | -1.32    |
| 12       | 7.72              | 5.38                        | -2.34    | 6.23                        | -1.49    |
| 13       | 7.68              | 7.65                        | -0.03    | 7.06                        | -0.62    |
| 14       | 7.92              | 9.05                        | 1.13     | 8.36                        | 0.44     |
| 15       | 7.60              | 7.66                        | 0.06     | 7.21                        | -0.39    |
| 16       | 9.40              | 8.97                        | -0.43    | 9.11                        | -0.29    |
| 17       | 8.30              | 8.66                        | 0.36     | 8.23                        | -0.07    |
| 18       | 7.92              | 8.50                        | 0.59     | 7.98                        | 0.06     |
| 19       | 7.31              | 7.83                        | 0.52     | 7.82                        | 0.51     |
| 20       | 7.77              | 8.42                        | 0.65     | 8.06                        | 0.29     |
| 21       | 7.98              | 8.61                        | 0.63     | 8.62                        | 0.64     |
| 22       | 7.74              | 9.11                        | 1.37     | 8.91                        | 1.17     |
| 23       | 9.05              | 9.54                        | 0.50     | 9.66                        | 0.62     |
| 24       | 9.10              | 10.26                       | 1.16     | 11.14                       | 2.04     |
| 25       | 9.70              | 9.10                        | -0.60    | 9.66                        | -0.04    |
| 26       | 9.22              | 9.77                        | 0.55     | 9.44                        | 0.22     |
| 27       | 8.03              | 8.15                        | 0.11     | 7.68                        | -0.35    |
| 28       | 5.72              | 5.86                        | 0.14     | 5.93                        | 0.21     |
| 29       | 5.47              | 5.36                        | -0.11    | 5.71                        | 0.24     |
| 30       | 5.12              | 5.19                        | 0.07     | 5.05                        | -0.07    |
| 31       | 5.82              | 5.34                        | -0.48    | 5.98                        | 0.15     |
| 32       | 5.82              | 5.01                        | -0.81    | 5.26                        | -0.57    |
| 33       | 5.10              | 5.45                        | 0.36     | 5.91                        | 0.81     |
| 34       | 7.09              | 5.75                        | -1.34    | 5.89                        | -1.20    |

|       |      |      |       |      |       |
|-------|------|------|-------|------|-------|
| 35    | 5.62 | 7.05 | 1.43  | 6.49 | 0.87  |
| 36    | 5.89 | 5.23 | -0.65 | 5.47 | -0.41 |
| 37    | 6.00 | 5.18 | -0.82 | 5.25 | -0.75 |
| 38    | 4.92 | 4.82 | -0.11 | 4.80 | -0.12 |
| 39    | 4.82 | 5.26 | 0.44  | 5.32 | 0.50  |
| 40    | 5.82 | 5.34 | -0.48 | 5.52 | -0.30 |
| 41    | 5.70 | 5.85 | 0.15  | 6.55 | 0.85  |
| 42    | 5.89 | 5.07 | -0.82 | 5.23 | -0.65 |
| 43    | 4.96 | 5.53 | 0.58  | 5.10 | 0.14  |
| 44    | 5.00 | 5.77 | 0.76  | 4.98 | -0.02 |
| 45    | 5.32 | 5.55 | 0.24  | 5.93 | 0.61  |
| 46    | 5.28 | 5.28 | 0.00  | 5.46 | 0.18  |
| 47    | 5.82 | 5.74 | -0.08 | 5.30 | -0.52 |
| 48    | 5.80 | 5.31 | -0.49 | 5.11 | -0.69 |
| 49    | 5.77 | 5.23 | -0.54 | 5.01 | -0.76 |
| 50    | 5.54 | 5.46 | -0.08 | 4.75 | -0.79 |
| 51    | 5.51 | 5.18 | -0.33 | 5.21 | -0.29 |
| <hr/> |      |      |       |      |       |
| 52*   | 6.06 | 6.82 | 0.76  | 7.14 | 1.08  |
| 53*   | 4.68 | 4.08 | -0.59 | 4.85 | 0.18  |
| 54*   | 5.04 | 6.62 | 1.57  | 6.62 | 1.58  |
| 55*   | 8.70 | 9.63 | 0.93  | 9.68 | 0.98  |
| 56*   | 7.65 | 8.18 | 0.53  | 8.64 | 0.98  |
| 57*   | 8.35 | 9.61 | 1.26  | 8.98 | 0.63  |
| 58*   | 5.68 | 5.26 | -0.41 | 5.30 | -0.38 |
| 59*   | 5.52 | 4.53 | -0.99 | 4.49 | -1.03 |
| 60*   | 5.55 | 5.29 | -0.27 | 5.44 | -0.11 |
| 61*   | 6.12 | 5.81 | -0.31 | 6.37 | 0.25  |
| 62*   | 5.06 | 5.28 | 0.22  | 4.64 | -0.41 |

\*Compound for test set
